# Supplementary material for: Distinct roles for S. cerevisiae H2A copies in recombination and repeat stability, with a role for H2A.1 threonine 126
Source: eLife. 2019 Dec 5;8:e53362. doi: 10.7554/eLife.53362 (PMC6927750; doi:10.7554/eLife.53362)
Supplement: Supplementary file 1. [file elife-53362-supp1.xlsx]

## Sheet: Supp. file 1 Fragility
Table S1 (CAG)0 and (CAG)85 fragility assay data
Fragility rates for individual experiments are listed and statsitical analysis is included. CAG repeat fragility is measured by the rate of 5-FOA resistance.
		Strain
		WT CAG-0	hta1Δ CAG0	hta2Δ CAG0	WT CAG85	hta1Δ CAG85	hta2Δ CAG85	hta1Δ::HTA2 hta2Δ CAG85	hta1-T126Aa CAG85	hta1Δpol32Δ CAG85	pol32Δ CAG85
		4.9	4.4	7	17.4	30.9	16.5	18.6	17.83	41.8	20.3
		1.9	4	6.2	10.2	36	11	18.4	25.47	46.7	41.8
		2.9	3.6	7	19.8	35.3	18.6	10.5	20.4	31.2	31.3
					25.3	45.9	13.6	13.8		67.7	43.3
					12.5	14.4	16.1				42.7
					26.7	19.4
Individual assays					16.2	22.2
Rate of FOAR						32.9
(x10-6)						20.4
						11.2
						36.9
						15.8
						13
						13.6
						22.5
						35.7
						11.7
						40
						21.5
						18.2
						35.5
Mean Rate		3.23333	4	5.2*	18.29	25.4	15.166	15.335	21.2	46.9**	35.9**
(x10-6)
SEM		0.88	0.25	1.55	2.32	2.35	1.31	1.96	2.23	7.67	4.47
No. replicates		(3)	(3)	(4)	(7)	(21)	(5)	(4)	(3)	(4)	(5)
p-value to WT		--	0.45	0.02	--	0.11	0.32	0.41	0.47	1.5 x 10-3	4.0 x 10-3
		*p<0.05 to WT, **p<0.01 to WT, Student's t-test
		aGenomic integration of T126A mutation, HTA2 present
