# Supplementary material for: Distinct roles for S. cerevisiae H2A copies in recombination and repeat stability, with a role for H2A.1 threonine 126
Source: eLife. 2019 Dec 5;8:e53362. doi: 10.7554/eLife.53362 (PMC6927750; doi:10.7554/eLife.53362)
Supplement: Supplementary file 2. [file elife-53362-supp2.xlsx]

## Sheet: Supp. file 2 Instability
Table S2 (CAG)85 repeat instability assay data
Summary data for CAG repeat instability assays. Instability was scored as the appearance of an expansion or contraction by the repeat stability PCR assay.
Statistics were done by Fisher's exact test using a 2x2 contingency table.
			Expansions							Contractions
(CAG)85 strain	Total Reactions		#	%	Fold over wt	p-value to wt	p-value to hta1Δ	p-value to hta1-T126A		#	%	Fold over wt	p-value to wt	p-value to hta1Δ	p-value to hta1-T126A
Wildtype	299		4	1.3	--	--	--	--		33	11	--	--	--	--
HTA1-plasmid wt	203		4	2	--	--	--	--		32	15.8	--	--	--	--
Histone variants
hta1Δ	280		25	8.9	6.7	2.7 x 10-5	--	--		79	28.2	2.6	1.8 x 10-7	--	--
hta2Δ	171		3	1.75439	1.3114	0.71	2.0 x 10-3	--		17	9.94152	0.900762	0.76	2.8 x 10-6	--
htb1Δ	96		3	3.1	2.3	0.37		--		21	21.9	2	0.01	0.28	--
htb2Δ	101		3	3	2.2	0.38	0.07	--		16	15.8	1.4	0.22	0.02	--
htz1Δ	103		2	1.9	1.5	0.65	0.02	--		24	23.3	2.1	3.1 x 10-3	0.37	--
hta1Δ::HTA2 hta2Δ	190		15	7.9	5.9	4.2 x 10-4	0.74	--		31	16.3	1.5	0.1	2.7 x 10-3	--
Repair proteins
lif1Δ	113		4	3.53982	2.64602	0.22	0.08	--		19	16.8142	1.52346	0.13	0.02	--
rad5Δ	123		7	5.7	4.3	0.02	0.32	--		24	19.5	1.8	0.03	0.08	--
rad51Δ	178		5	2.8	2.1	0.3	0.01	--		25	14	1.3	0.38	3.8 x 10-4	--
rad52Δ	199		4	2	1.5	0.72	1.5 x 10-3	--		45	22.6	2.1	6.4 x 10-4	0.17	--
rad57∆	116		4	3.4	2.6	0.23	0.06	--		18	15.5	1.4	0.24	7.1 x 10-3	--
pol32Δ	117		9	7.7	5.8	2.0 x 10-3	0.84	--		40	34.2	3.1	1.1 x 10-7	0.28	--
pol32Δrad51Δ	118		4	3.4	2.6	0.23	0.06	--		46	39	3.54545	1.0 x 10-4	0.04	--
hta1Δ and repair
hta1Δlif1Δ	141		11	7.8	5.8	1.0 x 10-3	0.85	--		16	11.3	1	1	6.8 x 10-5	--
hta1Δrad5Δ	207		13	6.3	4.7	4.2 x 10-3	0.31	--		37	17.9	1.6	0.04	9.7 x 10-3	--
hta1Δrad51Δ	120		2	1.66667	1.24583	1	7.7 x 10-3	--		23	19.1667	1.73662	0.04	0.06	--
hta1Δrad52Δ	320		10	3.1	2.3	0.18	2.8 x 10-3	--		55	17.2	1.6	0.03	1.6 x 10-3	--
hta1Δrad57Δ	203		4	1.97044	1.47291	0.72	1.4 x 10-3	--		66	32.5123	2.94581	5.6 x 10-9	0.32	--
hta1Δpol32Δ	151		7	4.6	3.5	4.9 x 10-2	0.12	--		48	31.8	2.9	2.1 x 10-7	0.44	--
hta1 point mutants – plasmid expression1
hta1-T126A hta2Δ	297		18	6.1	3.1	0.04a	0.21	--		41	13.8	0.9	0.61a	2.3 x 10-5	--
hta1-S129A hta2Δ	205		2	0.97561	0.495122	0.45a	7.3 x 10-5	0.65b		30	14.6341	0.928354	0.78a	4.1 x 10-4	0.80b
hta1 point mutants – genomic expression2
hta1-T126A	140		7	5	3.7	0.04	0.18	--		23	16.4	1.5	0.13	7.9 x 10-3	--
hta1-T126A hta2Δ	139		7	5	3.8	0.04	0.18	1c		16	11.5	1	0.87	1.1 x 10-4	1c
hta1-T126E	144		7	4.86	3.76923	0.04	0.17	1c		21	14.6	1.32727	0.28	1.3 x 10-3	1c
hta1-S129A	94		2	2.12766	1.59043	0.63	0.04	0.32c		6	6.38298	0.578337	0.24	3.4 x 10-6	0.32c
hta1-T126A S129A	168		8	4.8	3.6	0.0358	0.14	1c		25	14.9	1.3	0.31	1.2 x 10-2	0.76
hta1-T126A and repair1
hta1-T126A lif1Δ	190		9	4.7	2.4	0.17a	--	0.69b		38	20	1.3	0.29a	--	0.08b
hta1-T126A rad5Δ	137		8	5.83942	2.9635	0.07a	--	1b		29	21.1679	1.34284	0.25a	--	0.07b
hta1-T126A rad51Δ	263		10	3.8	1.9	0.30a	--	0.25b		65	24.7	1.6	0.02a	--	1.2 x 10-3 b
hta1-T126A rad52Δ	134		4	2.98507	1.51493	0.72a	--	0.24b		24	17.9104	1.13619	0.65a	--	0.31b
hta1-T126A rad57Δ	102		3	2.9	1.5	0.69a	--	0.31b		20	19.6	1.2	0.42a	--	0.20b
hta1-T126A pol32Δ	201		10	4.98	3.7	0.11a	--	0.69b		66	32.84	2.98	7.2 x 10-5 a	--	7.2 x 10-7 b
1Endogenous hta1Δ-htb1Δ hta2Δ-htb2Δ
2KANMX integrated downstream of HTA1 locus
acompared to HTA1-plasmid wildtype
bcompared to plasmid hta1-T126A
ccompared to genomic hta1-T126A
Statistics were done by Fisher's exact test using a 2x2 contingency table
