# Supplementary material for: Distinct roles for S. cerevisiae H2A copies in recombination and repeat stability, with a role for H2A.1 threonine 126
Source: eLife. 2019 Dec 5;8:e53362. doi: 10.7554/eLife.53362 (PMC6927750; doi:10.7554/eLife.53362)
Supplement: Supplementary file 3. [file elife-53362-supp3.xlsx]

## Sheet: Supp. file 3 Illumina Probe Seq
	Table S3 Illumina Array probe sequences. The 30-mer, non-overlapping
	probes spanned from 425 bp upstream of the repeat to 438 bp downstream
	of the repeat. The probes containing CAG repeats are highlighted. Probe 15
	contains 8 repeat units, probe 16 contains 9 repeat units (pure repeats),
	probe 17 contains 4 repeat units. In total, the array contained 21 CAG repeats.
	Probe No.	Probe sequence
	1	GGGTTTTGGGGTAATAACTGATATAATTAA
	2	ATTGAAGCTCTAATTTGTGAGTTTAGTATA
	3	CATGCACTGGCACGACAGGTTTCCCGACTG
	4	GAAAGCGGGCAGTGAGCGCAACGCAATTAA
	5	TGTGAGTTAGCTCACTCATTAGGCACCCCA
	6	GGCTTTACACTTTATGCTTCCGGCTCGTAT
	7	GTTGTGTGGAATTGTGAGCGGATAACAATT
	8	TCACACAGGAAACAGCTATGACCATGATTA
	9	CGCCAAGCTATTTAGGTGACACTATAGAAT
	10	ACTCAAGCTTGTACTTTGCGAACCATCGAT
	11	AGGTGGGGGTCCGTGGAGGATGGAACACGG
	12	ACGGCCCGGCTTGCTCGCTTCCCAGGCCTC
	13	CAGTTTGCCCATCCAGGTCAGGGCCTCAGC
	14	CTGGCCGAAAGAAAGAAATGGTCTGTGATC
	15	CCCCGCAGCAGCAGCAGCAGCAGCAGCAGC
	16	AGCAGCAGCAGCAGCAGCAGCAGCAGCAGC
	17	CAGCAGCAGCAGCATTCCCGGCTACAAGGA
	18	CCCTTCGAGCCCCGTTCGCCGGCCGCGGTG
	19	GAGCTCGAATTCGCCCTATAGTGAGTCGTA
	20	TTACAATTTCACTGGCCGTCGTTTTACAAC
	21	GTCGTGACTGGGAAAACCCTGGCGTTACCC
	22	AACTTAATCGCCTTGCAGCACATCCCCCTT
	23	TCGCCAGTGCATTTACTTATAATACAGTTT
	24	TTTAGTTTTGCTGGCCGCATCTTCTCAAAT
	25	ATGCTTCCCAGCCTGCTTTTCTGTAACGTT
	26	CACCCTCTACCTTAGCATCCCTTCCCTTTG
	27	CAAATAGTCCTCTTCCAACAATAATAATGT
	28	CAGATCCTGTAGAGACCACATCATCCACGG
	29	TTCTATACTGTTGACCCAATGCGTCTCCCT
	30	TGTCATCTAAACCCACACCGGGTGTCATAA
	31	TCAACCAATCGTAACCTTCATCTCTTCCAC
