# Supplementary material for: Distinct roles for S. cerevisiae H2A copies in recombination and repeat stability, with a role for H2A.1 threonine 126
Source: eLife. 2019 Dec 5;8:e53362. doi: 10.7554/eLife.53362 (PMC6927750; doi:10.7554/eLife.53362)
Supplement: Supplementary file 4. [file elife-53362-supp4.xlsx]

## Sheet: Supp. file 4 ChIP
Table S4 Chromatin immunoprecipitation at CAG155
ChIP qPCR data is listed by individual experiment. IP/IN expressed as a percentage and fold enrichment over ACT1 (IP/IN CAG divided by IP/IN ACT1) are included.
Antibodies and timepoints are as indicated.
IP/IN (%) CAG						IP/IN (%) ACT1						Fold Enrichment over ACT1
Antibody	Time	Exp 1	Exp 2	Average		Antibody	Time	Exp 1	Exp 2	Average		Antibody	Time	Exp 1	Exp 2	Average
H2A-T126ph	G1	2.039	1.99	2.0145		H2A-T126ph	G1	2.654	2.23	2.442		H2A-T126ph	G1	0.768	0.9	0.834
	0 min	1.788	0.0036867	0.895843			0 min	2.443	4.154e-05	1.22152			0 min	0.732	88.7478	44.7399
	20 min	1.804	0.110129	0.957065			20 min	1.677	0.0122604	0.84463			20 min	1.076	8.98253	5.02927
	40 min	2.685	9.02503	5.85502			40 min	1.899	0.0142704	0.956635			40 min	1.414	632.431	316.923
	60 min	1.402	0.417108	0.909554			60 min	1.934	0.0592531	0.996627			60 min	0.725	7.03941	3.88221
	G2	1.612	1.45	1.531			G2	1.703	1.75	1.7265			G2	0.946	0.83	0.888
IgY	0 min	0.0534972	0.008365	0.0309311		IgY	0 min	0.0338014	0.0190258	0.0190258		IgY	0 min	1.58269	0.439665	0.439665
	20 min	0.362666	0.0203459	0.191506			20 min	0.204316	0.0307413	0.0307413			20 min	1.77503	0.661843	0.661843
	40 min	0.0352755	0.0759997	0.0556376			40 min	0.018415	0.109585	0.109585			40 min	1.91558	0.693523	0.693523
	60 min	0.136112	0.23444	0.185276			60 min	0.167202	0.0653608	0.0653608			60 min	0.814059	3.58686	3.58686
H2B	0 min	0.16727	0.576383	0.371827		H2B	0 min	0.345846	2.07484	1.21034		H2B	0 min	0.483655	0.277796	0.380726
	20 min	0.1633	2.07664	1.11997			20 min	0.194057	3.40877	1.80141			20 min	0.841509	0.609205	0.725357
	40 min	0.126153	2.78572	1.45594			40 min	0.148445	6.3013	6.3013			40 min	0.849832	0.442086	0.442086
	60 min	0.210603	0.707425	0.459014			60 min	0.25187	1.23756	1.23756			60 min	0.836159	0.571629	0.571629
H3	0 min	3.38592	1.68564	2.53578		H3	0 min	5.98209	2.72669	4.35439		H3	0 min	0.57	0.62	0.595
	20 min	4.56891	3.90332	4.23611			20 min	5.64041	4.85594	5.24817			20 min	0.81	0.8	0.805
	40 min	4.68127	3.88483	4.28305			40 min	5.37998	4.93808	5.15903			40 min	0.87	0.79	0.83
	60 min	1.947	4.59527	3.27114			60 min	3.62316	4.34167	3.98241			60 min	0.54	1.06	0.8
Primer sequences					Amplicon size	Primer #			qPCR cycling conditions
0.6kb from CAG repeat:	5' GCT GGC GGG GTT GCC TTA CTG 3'				200 bp	376			Hold	50°C	2m
	5' GCC AGC AGC ATC CTG CGA TG 3'					377				95°C	10m
ACT1:	5' TCC AGA TGG TCA AGT CAT CA 3'				207 bp	492			PCR	95°C	15s
	5' TCG GCA ATA CCT GGG AAC AT 3'					493			40 cycles	60°C	1m
									Melt Curve	95°C	15s
									Continuous	60°C	1m
										95°C	15s
