# Supplementary material for: Distinct roles for S. cerevisiae H2A copies in recombination and repeat stability, with a role for H2A.1 threonine 126
Source: eLife. 2019 Dec 5;8:e53362. doi: 10.7554/eLife.53362 (PMC6927750; doi:10.7554/eLife.53362)
Supplement: Supplementary file 5. [file elife-53362-supp5.xlsx]

## Sheet: Supp. file 5 SCR
Table S5 Sister chromatid recombination assay data
Rates of SCR for individual experiments are listed. SCR is measured by the rate of Trp+ Ade+ colony formation.
			Strain
			Wildtype	hta1Δ	hta2Δ	hta1-T126A	hta1-T126A hta2Δ	hta1-S129A	hta1-S129A hta2Δ	pol32Δ	hta1Δpol32Δ	hta1-T126A pol32Δ
			11.1	2.8	5.7	5.4	3.2	3.6	4.4	3.6	1.8	4
			6.4	2.1	4.9	1.7	3	3.5	3.2	2.1	2.8	5
Rate Trp+Ade+			6.4	4.8	2.7	5.1	3.1	5.4	4.3	2.6	2.1	1.9
(x10-5)			5	2.9	6	1.7	4.4		4.3	1.7	1.6	1.5
			8.5		7.5	2	3.8		6.7			1
			5.3		6.1	1.5						3.5
			11.6			2.2
			6.5
Mean Rate			7.6	3.1**	5.5	2.8**	3.5**	3.9*	4.5*	2.5**	2.1**	2.8**
(x10-5)
SEM			0.9	0.58	0.66	0.63	0.26	0.84	0.53	0.29	0.25	0.64
No. replicates			(8)	(4)	(6)	(7)	(5)	(3)	(5)	(4)	(4)	(6)
p-value to WT			--	7.9 x 10-3	0.10	1.0 x 10-3	4.9 x 10-3	0.04	0.03	0.03	6.2 x 10-3	1.6 x 10-3
			*p<0.05 to WT, **p<0.01 to WT, Student's t-test
