# Supplementary material for: Distinct roles for S. cerevisiae H2A copies in recombination and repeat stability, with a role for H2A.1 threonine 126
Source: eLife. 2019 Dec 5;8:e53362. doi: 10.7554/eLife.53362 (PMC6927750; doi:10.7554/eLife.53362)
Supplement: Supplementary file 6. [file elife-53362-supp6.xlsx]

## Sheet: Supp. file 6 SSA
Table S6 Single strand annealing assay data
Data for individual SSA assay experiments are listed. SSA was measured by the percent viability of the
colonies on YPGal.
			Strain
			Wildtype	hta1Δ	hta2Δ	hta1-T126A
			78.2	76.7	82.6	80.3
			81.5	83.5	86.9	75.7
Percent Viability			73.8	88.8	88.4	72.2
(# colonies YEPD / YPGal) x 100)			94	92.8		80.8
			69.2	79.8		84.6
			77.6	78.6
			73.3
Mean Viability (%)			78.2	83.4	86	78.7
SEM			3.029	2.57	1.74	2.16
No. replicates			(7)	(6)	(3)	(5)
p-value to WT, Student's t-test			--	0.23	0.15	0.93
*p<0.05 to WT, **p<0.01 to WT, Student's t-test
