# Supplementary material for: Distinct roles for S. cerevisiae H2A copies in recombination and repeat stability, with a role for H2A.1 threonine 126
Source: eLife. 2019 Dec 5;8:e53362. doi: 10.7554/eLife.53362 (PMC6927750; doi:10.7554/eLife.53362)
Supplement: Supplementary file 7. [file elife-53362-supp7.xlsx]

## Sheet: Supp. file 7 BIR
Table S7 Break-induced replication assay data
Data for individual BIR assay experiments are listed. BIR was measured by the frequency of URA+ NAT- colonies. Data is further categorized by repair type (lower tables) for individual experiments.
						BIR Frequency (URA+NAT– x 10-2)
						Wildtype	hta1Δ	hta2Δ	pol32Δ	hta1-T126A	hta1-T126A hta2Δ
						20.5	7.2	25.9	0.14	20.7	24.85
						22.3	7.2	25.7	0.13	24.1	20.07
						22	8.2	20.3	0.09	22.9	20.51
						21.4	12.4	18.4	0.14	24	23.81
						23.9	13.3	24.6	0.19		19.36
						21.6	8.8	34.1	0.09
								13.8
								21
								17.4
				Mean Frequency (x10-2)		21.95	9.5**	22.36	0.1**	22.93	21.72
				SEM		0.46	1.09	1.99	0.02	0.79	1.09
				No. replicates		(6)	(6)	(9)	(6)	(4)	(5)
				p-value to WT		--	1.0 x 10-4	0.87	1.0 x 10-4	0.29	0.85
		Repair Type
		Wildtype					hta1Δ					hta2Δ
		BIR	NHEJ	GC	End loss/		BIR	NHEJ	GC	End loss/		BIR	NHEJ	GC	End loss/
					large deletion					large deletion					large deletion
		98.8827	0.558659	0	0.558659		84.097	2.15633	2.69542	11.0512		98.2759	1.72414	0	0
		98.1567	0.460829	0.460829	0.921659		89.8026	0.986842	1.31579	7.56579		100	0	0	0
% of total		97.2318	0.692042	0	0		89.4231	2.40385	0.961538	7.21154		98.0769	1.92308	0	0
colonies		96.6543	1.11524	0.371747	1.85874		89.7485	1.35397	8.31721	0.580271		96.2406	0.75188	0	3.00752
		95.7265	0.854701	0.854701	4.2735		91.1817	1.5873	5.99647	1.23457		98.0519	0.649351	0.649351	0.649351
		95.3271	1.86916	0.934579	1.86916		92.7536	1.26812	5.07246	1.44928		95.935	0.813008	0	3.25203
												98.0892	0	1.27389	0.636943
												98.2143	0.892857	0.892857	0
												96.4286	0.595238	0	2.97619
Mean Percent		97	0.9	0.4	1.6		89.5**	1.6*	4.1*	4.8		97.7	0.82	0.31	1.17
SEM		0.56	0.21	0.16	0.62		1.19	0.22	1.18	1.77		0.43	0.22	0.17	0.49
p-value to WT		--	--	--	--		2.0 x 10-4	4.6 x 10-2	0.01	0.11		0.33	0.74	0.62	0.61
		pol32Δ					hta1-T126A					hta1-T126A hta2Δ
		BIR	NHEJ	GC	End loss/		BIR	NHEJ	GC	End loss/		BIR	NHEJ	GC	End loss/
					large deletion					large deletion					large deletion
		27.7778	50	0	22.2222		95.6	0	0	4.4		98.7	0	1.3	0
		26.6667	50	0	23.3333		96.6	0	0.4	3		97.6	1.6	0.8	0
		28.1022	41.2409	11.3139	19.3431		98.6	0	0	1.4		96.2	1.3	1.3	1.3
		35.0785	32.4607	9.94764	22.5131		97.9	0.8	1.3	0.4		96.3	2.94	0	0.7
		31.25	25	20.8333	22.9167
		37.0629	29.3706	16.7832	16.7832
		31.0**	38.0**	9.81*	21.2**		97.2	0.2*	0.4	2.3		97.2	1.5	0.9	0.5
		1.74	4.37	3.5	1.1		0.7	0.2	0.3	0.9		0.6	0.6	0.3	0.3
		1.0 x 10-4	1.0 x 10-4	0.02	1.0 x 10-4		0.85	0.04	0.94	0.52		0.82	0.38	0.24	0.21
*p<0.05 to WT, **p<0.01 to WT, Student's t-test
