# Supplementary material for: Distinct roles for S. cerevisiae H2A copies in recombination and repeat stability, with a role for H2A.1 threonine 126
Source: eLife. 2019 Dec 5;8:e53362. doi: 10.7554/eLife.53362 (PMC6927750; doi:10.7554/eLife.53362)
Supplement: Supplementary file 8. [file elife-53362-supp8.xlsx]

## Sheet: Supp. file 8 HTA Gene Levels
Table S8 Gene Amplification of HTA1 and HTA2
DNA isolated from the indicated strains was tested by qPCR for HTA1 and HTA2 gene copy numbers. qPCR values were normalized to the
WT to determine amplication/copy numbers.
		HTA1 amplicona		Fold Over WT		HTA2 amplicona,b		Fold Over WT
YAC strains
CFY809	WT	1.13795		1		3.28641		1
CFY810	WT	1.00021		0.878957		2.66568		0.811121
CFY2700	hta2Δ	1.00047		0.879186		n.a.		n.a.
CFY2701	hta2Δ	1.56231		1.37291		n.a.		n.a.
CFY3758	hta1Δ	1.5299e-05		1.34443e-05		5.35658		1.62992
CFY3759	hta1Δ	0.00247789		0.00217749		3.64845		1.11016
CFY3945	hta1Δ	8.52019e-06		7.48729e-06		5.6255		1.71174
CFY3946	hta1Δ	1.24354e-05		1.09278e-05		5.06163		1.54017
CFY2814	hta1Δ::HTA2 hta2Δ	9.76489e-05		8.58109e-05		3.77179		1.14769
SCR strains
CFY2867	WT	1.45582		1		7.40487		1
CFY3007	hta2Δ	1.43532		0.985918		n.a.		n.a.
CFY3008	hta2Δ	1.13854		0.78206		n.a.		n.a.
CFY3746	hta1Δ	1.75119e-05		1.20289e-05		4.86318		0.656754
BIR strains
CFY3878	WT	0.95		1		0.97		1
CFY4177	hta1Δ	0.000719		0.000756842		1.1		1.13402
CFY4234	hta1Δ	0.000273		0.000287368		0.9		0.927835
CFY4235	hta1Δ	0.000247		0.00026		1.26		1.29897
CFY4264	hta2Δ	0.94		0.989474		n.a.		n.a.
CFY4265	hta2Δ	0.9		0.947368		n.a.		n.a.
CFY4266	hta2Δ	0.8		0.842105		n.a.		n.a.
SSA strains
CFY3682	WT	0.64		1		1.69		1
CFY4689	hta1Δ	3.65537e-06		5.71e-06		2.17		1.29
CFY4691	hta2Δ	0.72		1.13		n.a.		n.a.
aNormalized to ACT1 amplicon
bn.a.= no amplification of gene locus
Primer sequences				Amplicon size	Primer #
HTA1:	5' CTT GAC TGC TGT CTT GGA A 3'			226 bp	1614
	5' CTT GGT AGC CTT GGC AGA CT 3'				1616
HTA2:	5' GCT AAA GCT GGT TTA ACA TT 3'			321 bp	1613
	5' TTT GGC AGT CTT GGC AGA CT 3'				1617
ACT1:	5' TCC AGA TGG TCA AGT CAT CA 3'			207 bp	492
	5' TCG GCA ATA CCT GGG AAC AT 3'				493
