# Supplementary material for: Distinct roles for S. cerevisiae H2A copies in recombination and repeat stability, with a role for H2A.1 threonine 126
Source: eLife. 2019 Dec 5;8:e53362. doi: 10.7554/eLife.53362 (PMC6927750; doi:10.7554/eLife.53362)
Supplement: Supplementary file 10. [file elife-53362-supp10.xlsx]

## Sheet: Supp. file 10 Pol32 qRT-PCR
Table S10 Pol32 mRNA expression
qRT-PCR was used to measure POL32 mRNA levles in the WT and hta1Δ stains.
Priming Method	Strain #	Genotype	POL32 mRNA levelsa	Fold over WT
Random Hexamers	810	Wildtype	0.01026	1
	3758	hta1Δ	0.0105476	1.02804
Oligo dT	810	Wildtype	0.00698657	1
	3758	hta1Δ	0.00751194	1.0752
aNormalized to ACT1
Primer sequences				Amplicon size	Primer #
POL32:	5' CAC GCC AGA AGA AAC AAC CG 3'			269 bp	2121
	5' TAG GTG AGT TGG GCT TGG AC 3'				2629
ACT1:	5' TCC AGA TGG TCA AGT CAT CA 3'			207 bp	492
	5' TCG GCA ATA CCT GGG AAC AT 3'				493
