# Supplementary material for: Distinct roles for S. cerevisiae H2A copies in recombination and repeat stability, with a role for H2A.1 threonine 126
Source: eLife. 2019 Dec 5;8:e53362. doi: 10.7554/eLife.53362 (PMC6927750; doi:10.7554/eLife.53362)
Supplement: Supplementary file 11. [file elife-53362-supp11.xlsx]

## Sheet: Supp. file 11 Yeast Strains
Table S11 Yeast strains used in this study
All yeast strains used in this study are listed using the CF lab catalog number/name. Genotype and reference (when applicable) are included.
Strain	Genotype	Reference
BY4705	MATα, ade2Δ::hisG, his3Δ200, leu2Δ0, lys2Δ0, met15Δ0, trp1Δ63, ura3Δ0	Baker et al, 2007
BY4741	MATa, his3Δ1, leu2Δ0, met15Δ0, ura3Δ0	Baker et al, 2007
BY4742	MATα, his3Δ1, leu2Δ0, lys2Δ0, ura3Δ0	Baker et al, 2007
FY406	Mat a, (hta1-htb1)Δ:: LEU2, (hta2-htb2)Δ::TRP1, ura3-52, leu2D1, lys2D1, lys2-128D, his3D200, trp1D63, pAB6 (HTA1-HTB1, URA3)	Hirschhorn et al, 1995
CFY1330, 1331 HTA1-wt	Same as FY406 but pJD150 (HTA1-HTB1, HIS3) instead of pAB6; YAC CF1 [LEU2, URA3, CAG-85]	Downs et al, 2000; this study
CFY810	Same as BY4705, but containing YAC CF1 [LEU2, URA3, CAG-85]	Yang & Freudenreich, 2007
CFY1381	Same as BY4705, but containing YAC CF1 [LEU2, URA3, No tract]	Zhang & Freudenreich, 2007
CFY3758, 3759, 3945, 3946	Same as BY4705, but hta1Δ::HIS3MX6, YAC CF1 [LEU2, URA3 CAG-85]	This study
CFY2700, 2701	Same as BY4705, but hta2Δ::KANMX6, YAC CF1 [LEU2, URA3 CAG-85]	This study
CFY2813, 2814	Same as BY4705, but hta1Δ::HTA2-KANMX6, YAC CF1 [LEU2, URA3 CAG-85]	This study
CFY2816	Same as BY4705, but htb1Δ::KANMX6, YAC CF1 [LEU2, URA3 CAG-85]	This study
CFY2817, 2818	Same as BY4705, but htb2Δ::KANMX6, YAC CF1 [LEU2, URA3 CAG-85]	This study
CFY3088	Same as BY4705, but htz1Δ::KANMX6, YAC CF1 [LEU2, URA3, CAG-85]	House et al, 2014
CFY2819	Same as BY4705, but lifΔ::KANMX6, YAC CF1 [LEU2, URA3 CAG-85]	House et al, 2014
CFY4149, 4150	Same as BY4705, but pol32Δ::TRP1, YAC CF1 [LEU2, URA3 CAG-85]	This study
CFY4529	Same as BY4705, but pol32Δ::TRP1 rad51Δ::KANMX6, YAC CF1 [LEU2, URA3 CAG-85]	This study
CFY2821	Same as BY4705, but rad5Δ::TRP1, YAC CF1 [LEU2, URA3 CAG-85]	House et al, 2014
CFY2439, 2440	Same as BY4705, but rad51Δ::KANMX6, YAC CF1 [LEU2, URA3 CAG-85]	House et al, 2014
CFY2441, 2442	Same as BY4705, but rad52Δ::KANMX6, YAC CF1 [LEU2, URA3 CAG-85]	House et al, 2014
CFY4396, 4397	Same as BY4705, but rad57Δ::HIS3MX6, YAC CF1 [LEU2, URA3 CAG-85]	This study
CFY3954, 3955	Same as BY4705, but hta1Δ::HIS3MX6, lif1Δ::TRP1, YAC CF1 [LEU2, URA3 CAG-85]	This study
CFY4151	Same as BY4705, but hta1Δ::HIS3MX6, pol32Δ::TRP1, YAC CF1 [LEU2, URA3 CAG-85]	This study
CFY3956, 3957	Same as BY4705, but hta1Δ::KANMX6, rad5Δ::TRP1, YAC CF1 [LEU2, URA3 CAG-85]	This study
CFY3951, 3952	Same as BY4705, but hta1Δ::KANMX6, rad51Δ::HIS3MX6, YAC CF1 [LEU2, URA3 CAG-85]	This study
CFY2221, 2222, 3976, 3977, 3978	Same as BY4705, but hta1Δ::KANMX6, rad52Δ::HIS3MX6, YAC CF1 [LEU2, URA3 CAG-85]	This study
CFY3001	Same as BY4705, but hta1Δ::KANMX6, rad57Δ::HIS3MX6, YAC CF1 [LEU2, URA3 CAG-85]	This study
CFY1334, 1335	Same as FY406 but pJD151 (hta1-S129A-HTB1, HIS3) instead of pAB6; YAC CF1 [LEU2, URA3, CAG-85]	Harvey, Jackson & Downs, 2005; this study
CFY1340, 1341	Same as FY406 but pJD192 (hta1-T126A-HTB1, HIS3) instead of pAB6; YAC CF1 [LEU2, URA3, CAG-85]	Harvey, Jackson & Downs, 2005; this study
CFY3438	Same as FY406 but pJD192 (hta1-T126A-HTB1, HIS3) instead of pAB6; lif1Δ::KANMX6, YAC CF1 [LEU2, URA3, CAG-85]	Harvey, Jackson & Downs, 2005; this study
CFY4259	Same as FY406 but pJD192 (hta1-T126A-HTB1, HIS3) instead of pAB6; rad5Δ::KANMX6, YAC CF1 [LEU2, URA3, CAG-85]	Harvey, Jackson & Downs, 2005; this study
CFY2366, 2367	Same as FY406 but pJD192 (hta1-T126A-HTB1, HIS3) instead of pAB6; rad51Δ::KANMX6, YAC CF1 [LEU2, URA3, CAG-85]	Harvey, Jackson & Downs, 2005; this study
CFY4271	Same as FY406 but pJD192 (hta1-T126A-HTB1, HIS3) instead of pAB6; pol32Δ::KANMX6, YAC CF1 [LEU2, URA3, CAG-85]	Harvey, Jackson & Downs, 2005; this study
CFY4262, 4263	Same as FY406 but pJD192 (hta1-T126A-HTB1, HIS3) instead of pAB6; rad52Δ::KANMX6, YAC CF1 [LEU2, URA3, CAG-85]	Harvey, Jackson & Downs, 2005; this study
CFY3440	Same as FY406 but pJD192 (hta1-T126A-HTB1, HIS3) instead of pAB6; rad57Δ::KANMX6, YAC CF1 [LEU2, URA3, CAG-85]	Harvey, Jackson & Downs, 2005; this study
CFY4068, 4069	Same as BY4705, but HTA1::hta1-S129A-KANMX6, YAC CF1 [LEU2, URA3, CAG-85]	This study
CFY4153	Same as BY4705, but HTA1::hta1-S129A-KANMX6 hta2Δ::TRP1, YAC CF1 [LEU2, URA3, CAG-85]	This study
CFY4070, 4071	Same as BY4705, but HTA1::hta1-T126A-KANMX6, YAC CF1 [LEU2, URA3, CAG-85]	This study
CFY4544, 4545 ,4546	Same as BY4705, but HTA1::hta1-T126E-KANMX6, YAC CF1 [LEU2, URA3, CAG-85]	This study
CFY4154	Same as BY4705, but HTA1::hta1-T126A-KANMX6 hta2Δ::TRP1, YAC CF1 [LEU2, URA3, CAG-85]	This study
	SCR Strains
LSY1519-1D	W303, Matα, ade2-nde1-::TRP1::ade2-I-Sce1+/aatII-; RAD5+, ade2-1 trp1-1 his3-11,15 can1-100 ura3-1 leu2-3,112	Mozlin et al, 2008
CFY3476	Same as LSY1519-1D, but hta1Δ::KANMX6	Mozlin et al, 2008; this study
CFY3007, 3008	Same as LSY1519-1D, but hta2Δ::KANMX6	Mozlin et al, 2008; this study
CFY4212, 4213	Same as LSY1519-1D, but pol32Δ::KANMX6	Mozlin et al, 2008; this study
CFY4246	Same as LSY1519-1D, but hta1Δ::HIS3MX6 pol32Δ::KANMX6	Mozlin et al, 2008; this study
CFY4012, 4072	Same as LSY1519-1D, but HTA1::hta1-S129A-KANMX6	Mozlin et al, 2008; this study
CFY4146, 4147	Same as LSY1519-1D, but HTA1::hta1-S129A-KANMX6 hta2Δ::HIS3MX6	Mozlin et al, 2008; this study
CFY4013, 4014,4073	Same as LSY1519-1D, but HTA1::hta1-T126A-KANMX6	Mozlin et al, 2008; this study
CFY4255, 4256, 4257	Same as LSY1519-1D, but HTA1::hta1-T126A-KANMX6 hta2Δ::HIS3MX6	Mozlin et al, 2008; this study
	BIR Strains
yRA52	MATa::DEL Hocs::hisG ura3Δ851 trp1Δ63 leu2Δ::KAN hmlΔ::hisG HMR::ADE3 ade3::GAL::HO can1Δ::UR:: HOcs::NAT RA3::TRP1	Anand et al, 2014
CFY4177, 4234, 4235	Same as yRA52, but hta1Δ::HPH	Anand et al, 2014; this study
CFY4264, 4265, 4266	Same as yRA52, but hta2Δ::LEU2	Anand et al, 2014; this study
CFY4267, 4268	Same as yRA52, but pol32:Δ:LEU2	Anand et al, 2014; this study
CFY 4775, 4776	Same as yRA52, but but HTA1::hta1-t126a-HPH	Anand et al, 2014; this study
CFY 4547, 4548	Same as yRA52, but but HTA1::hta1-t126a-kanMX hta2Δ::LEU2	Anand et al, 2014; this study
	Single Stran Annealing Strains
YMV80	MATΔ::hisG hmlΔ::ADE1 hmrΔ::ADE1 ade1 lys5 ura3-52 trp1Δ HO ade3::GAL-HO leu2::cs	Vaze et al, 1999
CFY4689	same as YMV80, but hta1Δ::kanMX	Vaze et al, 1999, this study
CFY4691, 4692	same as YMV80, but hta2Δ::kanMX	Vaze et al, 1999, this study
CFY4769, 4770	same as YMV80, but HTA1::hta1-t126a-kanMX	Vaze et al, 1999, this study
